# Supplementary material
Source: publisher figshare collection journal article supplement (https://acs.figshare.com/ndownloader/files/4206703)
Supplement: Supplementary file 1 [file 4206703]

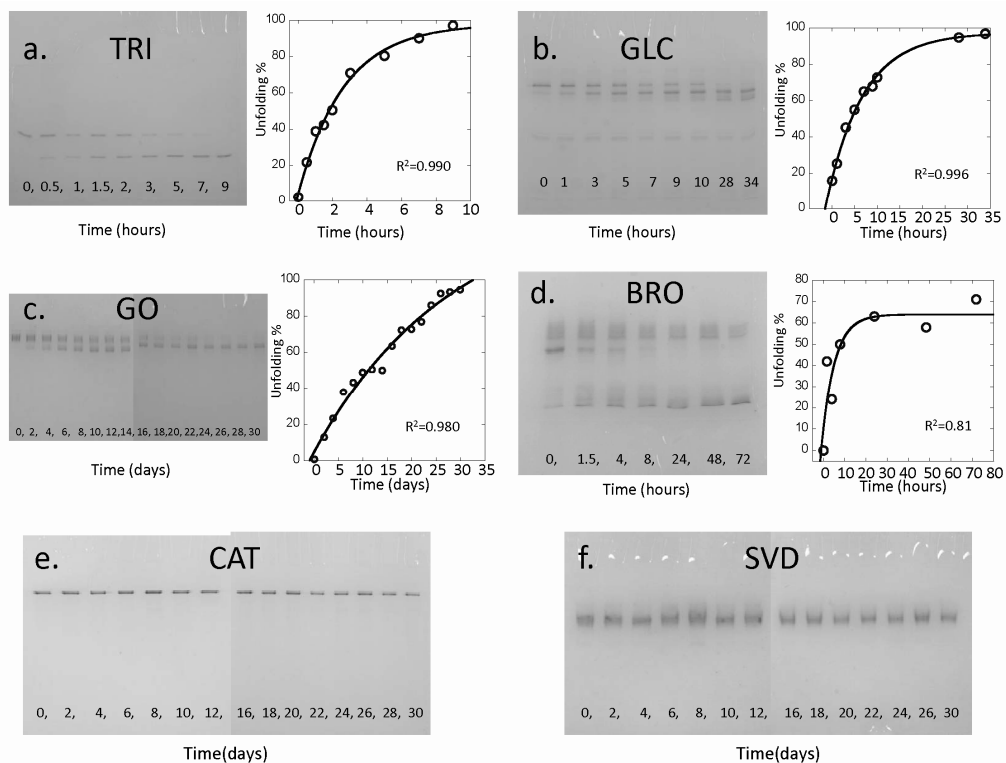

Figure 1S

**Supplementary Figure 1** S-TraP experiment for proteins incubated in 1% SDS buffer at 37°C. A diverse group of proteins was assayed, including monomers (trypsin inhibitor-TRI and bromelain-Bro), dimers (glucose oxidase -GO) and  $\beta$ -glucosidase-GLC) and tetramers (catalase-CAT, and streptavidin-SVD). Each gel lane shows the denaturation of the protein after a certain incubation time. Gel data was imaged and fitted to a single exponential to determine the unfolding rates. For CAT and SVD, there was no denaturation after 30 days of incubation.
